# Supplementary material
Source: publisher site journal article supplement (https://www.dovepress.com/article/368352)
Supplement: Supplementary file 1 [file get_supplementary_file.php]

# Supplementary Material

**Table S1: Epiect ChIP qPCR Assay details**

|                             | <b>Assay position relative to CCL2 TSS position</b> |                       |
|-----------------------------|-----------------------------------------------------|-----------------------|
|                             | RefSeq nos.: NM_002982.3                            |                       |
| <b>ChIP-qPCR Assay Cat#</b> | <b>Assay Tile</b>                                   | <b>Assay Position</b> |
| GPH1005667(-)06A            | -06Kb                                               | -5398                 |
| GPH1005667(-)05A            | -05kb                                               | -4502                 |
| GPH1005667(-)04A            | -04kb                                               | -3506                 |
| GPH1005667(-)03A            | -03kb                                               | -2408                 |
| GPH1005667(+ )01A           | +01kb                                               | 595                   |
| GPH1005667(+ )04A           | +04kb                                               | 3599                  |

**Figure S1: Schematic Diagram of Acetylation Sites spanning CCL2 Promotor region**

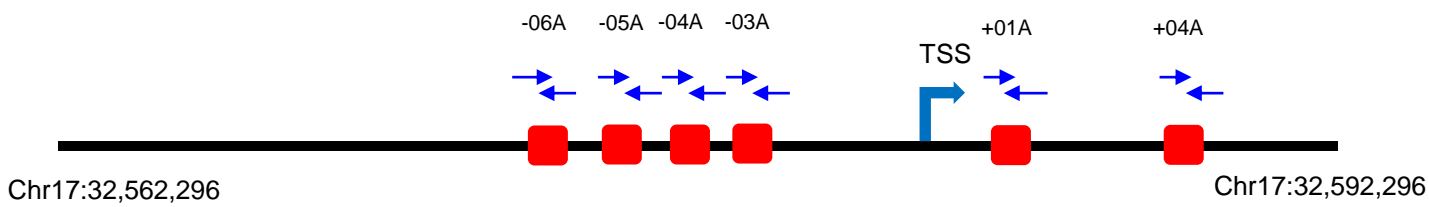

Legend:  Transcription Start Site of CCL2  ChIP q PCR Assay  Acetylation Site
